# Supplementary material
Source: publisher site journal article supplement (https://www.dovepress.com/article/514423)
Supplement: Supplementary file 1 [file 514423-revised-supplementary-material.docx]

## Appendix 1: Preferred Reporting Items for Systematic Reviews and Meta-Analyses extension for Scoping Reviews (PRISMA ScR) Checklist

| **SECTION** | **ITEM** | **PRISMA-ScR CHECKLIST ITEM** | **REPORTED ON PAGE #** |
| --- | --- | --- | --- |
| **TITLE** | | | |
| Title | 1 | Identify the report as a scoping review. | Page 1 |
| **ABSTRACT** | | | |
| Structured summary | 2 | Provide a structured summary that includes (as applicable): background, objectives, eligibility criteria, sources of evidence, charting methods, results, and conclusions that relate to the review questions and objectives. | Page 2 |
| **INTRODUCTION** | | | |
| Rationale | 3 | Describe the rationale for the review in the context of what is already known. Explain why the review questions/objectives lend themselves to a scoping review approach. | Pages 3-4 |
| Objectives | 4 | Provide an explicit statement of the questions and objectives being addressed with reference to their key elements (e.g., population or participants, concepts, and context) or other relevant key elements used to conceptualize the review questions and/or objectives. | Page 4 |
| **METHODS** | | | |
| Protocol and registration | 5 | Indicate whether a review protocol exists; state if and where it can be accessed (e.g., a Web address); and if available, provide registration information, including the registration number. | Pages 4-5 |
| Eligibility criteria | 6 | Specify characteristics of the sources of evidence used as eligibility criteria (e.g., years considered, language, and publication status), and provide a rationale. | Page 5 |
| Information sources | 7 | Describe all information sources in the search (e.g., databases with dates of coverage and contact with authors to identify additional sources), as well as the date the most recent search was executed. | Page 5 |
| Search | 8 | Present the full electronic search strategy for at least 1 database, including any limits used, such that it could be repeated. | Appendix 2 |
| Selection of sources of evidence | 9 | State the process for selecting sources of evidence (i.e., screening and eligibility) included in the scoping review. | Page 5 |
| Data charting process | 10 | Describe the methods of charting data from the included sources of evidence (e.g., calibrated forms or forms that have been tested by the team before their use, and whether data charting was done independently or in duplicate) and any processes for obtaining and confirming data from investigators. | Pages 5-6 |
| Data items | 11 | List and define all variables for which data were sought and any assumptions and simplifications made. | Page 5 |
| Critical appraisal of individual sources of evidence | 12 | If done, provide a rationale for conducting a critical appraisal of included sources of evidence; describe the methods used and how this information was used in any data synthesis (if appropriate). | N/A |
| Synthesis of results | 13 | Describe the methods of handling and summarizing the data that were charted. | Pages 5-6 |
| **RESULTS** | | | |
| Selection of sources of evidence | 14 | Give numbers of sources of evidence screened, assessed for eligibility, and included in the review, with reasons for exclusions at each stage, ideally using a flow diagram. | Page 6, Figure 1 |
| Characteristics of sources of evidence | 15 | For each source of evidence, present characteristics for which data were charted and provide the citations. | Page 6, Table 1 |
| Critical appraisal within sources of evidence | 16 | If done, present data on critical appraisal of included sources of evidence (see item 12). | N/A |
| Results of individual sources of evidence | 17 | For each included source of evidence, present the relevant data that were charted that relate to the review questions and objectives. | Table 1 |
| Synthesis of results | 18 | Summarize and/or present the charting results as they relate to the review questions and objectives. | Pages 6-8 |
| **DISCUSSION** | | | |
| Summary of evidence | 19 | Summarize the main results (including an overview of concepts, themes, and types of evidence available), link to the review questions and objectives, and consider the relevance to key groups. | Pages 8-12 |
| Limitations | 20 | Discuss the limitations of the scoping review process. | Page 12 |
| Conclusions | 21 | Provide a general interpretation of the results with respect to the review questions and objectives, as well as potential implications and/or next steps. | Pages 12-13 |
| **FUNDING** | | | |
| Funding | 22 | Describe sources of funding for the included sources of evidence, as well as sources of funding for the scoping review. Describe the role of the funders of the scoping review. | Page 1 |

## Appendix 2: Complete Search Strategies

The following key terms were used to drive the search, which were then adapted to the specific structure of each individual database.

| Component | Key terms (1 AND 2) |
| --- | --- |
| 1. Cost-effectiveness | cost* OR economic* OR financ* |
| 2. Polycystic ovary syndrome | polycystic ovar* |

**PubMed**

((((cost*[Title/Abstract]) OR (economic*[Title/Abstract]) OR (financ*[Title/Abstract]))) AND (("polycystic ovar*[Title/Abstract])

N=368

**National Health Service Economic Evaluation Database (NHS EED)**

Cost* OR economic* AND PCOS

Cost* OR economic* AND polycystic ovar*

N=5

**Medline (OVID)**

1. (cost* or economics* or financ*).mp.
2. "polycystic ovar*".mp.
3. 1 and 2

N=307

**Web of Science**

(AB=(polycystic ovary syndrome)) AND (AB=(cost*) OR AB=(economic*) OR AB=(financ*))

N=319

**EconLit**

polycystic ovary syndrome OR pcos OR polycystic ovarian syndrome OR polycystic ovaries

N=6

**Cost Effectiveness Analysis Registry**

polycystic ovary syndrome

or ICD-10 E28.2

N=0

Supplementary Table 1: Characteristics and Economic Outcomes of Studies Related to the Treatment of Women with Polycystic Ovary Syndrome

| **Lead author (Publication Year) Reference** | **Country** | **Population / CC-treatment statusa (total sample size)** | **Study Design** | **Intervention (sample size)** | **Comparison (sample size)** | **Perspective** | **Outcome Measure** | **Cost or Incremental Cost Effectiveness Ratio point estimatea** | **Interpretation and Significance Statementb** |
| --- | --- | --- | --- | --- | --- | --- | --- | --- | --- |
| Infertility treatment (n=9) | | | | | | | | | |
| *Women with CC-resistant PCOS (n=5)* | | | | | | | | | |
| Fridstrom (1999) (1) | Sweden | Women with CC-resistant PCOS (n=28) | Within trial cost minimisation analysis | IVF cycles (n=13) | OI cycles (n=15) | Partial health system (no NICU) | Pregnancy | -$14,407.69 | Based on no significant difference in outcome, the per pregnancy treatment costs of IVF are lower than OI by $14,408, but statistically significant difference in costs was not assessed. |
| Nahuis (2012) (2) | The Netherlands | Women with CC-resistant PCOS(n=168) | Follow-up trial cost minimisation analysis | Laparoscopic ovarian electrocautery, followed by CC and rFSH when anovulation persisted for two months (n=83) | OI with rFSH (n=85) | Health system | First livebirth | -$4,976.75* | Based on no significant difference in outcome, laparoscopic ovarian electrocautery costs $4,977 less per first livebirth compared to OI with rFSH, with significant difference in costs was reported. |
| Farquhar (2004) (3) | New Zealand | Women with CC-resistant PCOS (n=50) | Within trial cost minimisation analysis | Laparoscopic ovarian diathermy (n=29) | OI with 3 cycles of uFSH or rFSH (n=21) | Societal | Pregnancy | -$6,671.62* | Based on no significant difference in outcome, laparoscopic ovarian diathermy results in lower cost of $6,672 per pregnancy, compared to OI with uFSH or rFSH, with significant difference in costs was reported. |
| Livebirth | -$9,094.86* | Based on no significant difference in outcome, laparoscopic ovarian diathermy results in lower cost of $9,095 per livebirth, compared to OI with uFSH or rFSH, with significant difference in costs was reported. |
| Frènea (2014) (4) | Belgium | Women with CC-resistant PCOS (n=78) | Within trial cost minimisation analysis | Laparoscopic ovarian diathermy, followed by CC and/or hMG when anovulation persisted for two months (n=35) | OI with hMG (n=43) | Societal | Pregnancy | -$6,151.75 | Based on no significant difference in outcome, laparoscopic ovarian diathermy results in lower cost of $6,152 per pregnancy, compared to OI with hMG, but this is based upon non statistically significant differences in costs. |
| Livebirth | -$25,082.76 | Based on no significant difference in outcome, laparoscopic ovarian diathermy results in lower cost of $25,083 per livebirth, compared to OI with hMG, but this is based upon non statistically significant differences in costs. |
| Revelli (2006) (5) | Italy | Women with CC-resistant PCOS (n=76) | Within trial cost minimisation analysis | OI with rFSH (n=37) | OI with HP-uFSH (n=39) | Health system | Delivery | -$352.19 (assumed the costs were reported as price of the year 2004) | Based on no significant difference in outcome, OI with rFSH results in lower cost of $352 per delivery, compared to OI with HP-uFSH, but statistically significant difference in costs was not assessed. |
| *Other populations (n=4)* | | | | | | | | | |
| Kara (2011) (6) | Turkey | Women with PCOS undergoing IVF/ICSI treatment (unknown CC-treatment status) (n=102) | Observational cost minimisation analysis | One cycle of rFSH (n=54) | One cycle of HP-uFSH (n=48) | Health system | Pregnancy | -$25.75 (assumed the costs were reported as price of the year 2009) | Based on no significant difference in outcome, a cycle of treatment with rFSH results in a lower cost of $26 per pregnancy, compared to HP-uFSH, but this is based upon non statistically significant differences in costs. |
| Gerli (2004) (7) | Italy | Women with PCOS and at least two years of infertility, either with CC-failure or CC-resistance (n=170) | Within trial cost minimisation analysis | uFSH (n=82) | rFSH (n=88) | Health system | Pregnancy | -$2,782.45 | Based on no significant difference in outcome, uFSH costs $2,782 less per pregnancy than rFSH, but this is based upon non statistically significant differences in costs. |
| Moolenaar (2014) (8) | The Netherlands | Women with PCOS and CC-failure (n=5,000 hypothetical) | Modelled cost-effectiveness analysis | Maximum of 3 cycles of IVF (n=5,000) | 6 cycles of CC and a maximum of 3 cycles of IVF (n=5,000) | Health system | First livebirth | Dominated | A maximum of 3 cycles of IVF was dominated (more costly, less effective) by 6 additional cycles of CC and a maximum of 3 cycles of IVF. |
| 6 cycles of gonadotropins, followed by a maximum of 3 cycles of IVF (n=5,000) | 6 cycles of CC and a maximum of 3 cycles of IVF (n=5,000) | Health system | First livebirth | Dominated | 6 cycles of gonadotropins, followed by a maximum of 3 cycles of IVF was dominated (more costly, less effective) by 6 additional cycles of CC and a maximum of 3 cycles of IVF. |
| 12 cycles of gonadotropins, followed by a maximum of 3 cycles of IVF (n=5,000) | 6 cycles of CC and a maximum of 3 cycles of IVF (n=5,000) | Health system | First livebirth | Dominated | 12 cycles of gonadotropins, followed by a maximum of 3 cycles of IVF was dominated (more costly, less effective) by 6 additional cycles of CC and a maximum of 3 cycles of IVF. |
| 6 cycles of CC, 6 cycles of gonadotropins and 3 cycles of IVF (n=5,000) | 6 cycles of CC and a maximum of 3 cycles of IVF (n=5,000) | Health system | First livebirth | $1,335.40 / livebirth | 6 cycles of CC, 6 cycles of gonadotropins, and 3 cycles of IVF cost an additional $1,335 per livebirth gained compared to an additional 6 cycles of CC and a maximum of 3 cycles of IVF, but there was no statistically significant difference in costs. |
| 6 additional cycles of CC, 12 cycles of gonadotropins, and 3 cycles of IVF (n=5,000) | 6 cycles of CC and a maximum of 3 cycles of IVF (n=5,000) | Health system | First livebirth | $1,337.08 / livebirth | 6 cycles of CC, 12 cycles of gonadotropins, and 3 cycles of IVF cost an additional $1,337 per livebirth gained compared to an additional 6 cycles of CC and a maximum of 3 cycles of IVF, but there was no statistically significant difference in costs. |
| Luo (2021) (9) | China | Women with PCOS scheduled for AC-FET and receiving no more than two blastocysts (unknown CC-treatment status) (n=343) | Within trial cost minimisation analysis | AC-FET without GnRH-a pre-treatment (n=171) | AC-FET with GnRH-a pre-treatment (n=172) | Health system | Livebirth | -$1,238.02* | Based on no significant difference in outcome, AC-FET without GnRH-a pre-treatment results in cost saving of $1,238 per livebirth, compared to AC-FET with GnRH-a pre-treatment, with significant difference in costs was reported. |
| **Pregnancy care (n=1)** | | | | | | | | | |
| Alenzi (2021) (10) | United States | Pregnant women with PCOS, not previously diagnosed with diabetes (n=10,000 hypothetical) | Modelled cost-effectiveness analysis | Metformin - 500mg twice daily (n=10,000) | No treatment (n=10,000) | Health system | Normal glucose regulation without developing GDM | Dominant | Treatment with metformin was dominant (lower cost, more effective). |
| aCC-treatment status may include the following: treatment naïve, CC-resistant (do not ovulate for 3+ cycles), CC-failure (ovulate but do not conceive after 6 ovulatory cycles), mixed, or unknown.  bCosts were reported in 2022 United States Dollars.  cSample size was not recorded.  *Significant difference.  Abbreviations: Artificial cycle-prepared frozen embryo transfer = AC-FET; GnRH agonist = GnRH-a; Polycystic ovary syndrome = PCOS; Gestational diabetes mellitus = GDM; hMG = human Menopausal Gonadotropin; In vitro fertilisation = IVF; Recombinant follicle stimulating hormone = rFSH; Urinary follicle stimulating hormone = uFSH; Assisted reproductive therapy = ART; Highly-purified urinary follicle stimulating hormone = HP-uFSH; Intracytoplasmic sperm injection = ICSI; Ovulation induction = OI; Clomiphene citrate = CC; Neonatal intensive care unit = NICU. | | | | | | | | | |

**References**

1. Fridström M, Sjöblom P, Granberg M, Hillensjö T. A cost comparison of infertility treatment for clomiphene resistant polycystic ovary syndrome. Acta Obstet Gynecol Scand. 1999;78(3):212-6.

2. Nahuis MJ, Oude Lohuis E, Kose N, Bayram N, Hompes P, Oosterhuis GJE, et al. Long-term follow-up of laparoscopic electrocautery of the ovaries versus ovulation induction with recombinant FSH in clomiphene citrate-resistant women with polycystic ovary syndrome: an economic evaluation. Human Reproduction. 2012;27(12):3577-82.

3. Farquhar CM, Williamson K, Brown PM, Garland J. An economic evaluation of laparoscopic ovarian diathermy versus gonadotrophin therapy for women with clomiphene citrate resistant polycystic ovary syndrome. Hum Reprod. 2004;19(5):1110-5.

4. De Frène V, Gerris J, Weyers S, Dhont M, Vansteelandt S, Annemans L, et al. Gonadotropin Therapy versus Laparoscopic Ovarian Drilling in Clomiphene Citrate-Resistant Polycystic Ovary Syndrome Patients: A Retrospective Cost-Effectiveness Analysis. Gynecol Obstet Invest. 2015;80(3):164-9.

5. Revelli A, Poso F, Gennarelli G, Moffa F, Grassi G, Massobrio M. Recombinant versus highly-purified, urinary follicle-stimulating hormone (r-FSH vs. HP-uFSH) in ovulation induction: a prospective, randomized study with cost-minimization analysis. Reprod Biol Endocrinol. 2006;4:38.

6. Kara M, Kutlu T, Sofuoğlu K. Comparison of the Recombinant Versus Highly-Purified, Urinary Follicle-Stimulating Hormone (r-FSH vs. HP-uFSH) in the Polycystic Ovary Syndrom Patients who had Antagonist Cycle with In Vitro Fertilization- mbryo Transfer. Turkiye Klinikleri Tip Bilimleri Dergisi. 2011;31:775-9.

7. Gerli S, Casini ML, Unfer V, Costabile L, Mignosa M, Di Renzo GC. Ovulation induction with urinary FSH or recombinant FSH in polycystic ovary syndrome patients: a prospective randomized analysis of cost-effectiveness. Reprod Biomed Online. 2004;9(5):494-9.

8. Moolenaar LM, Nahuis MJ, Hompes PG, van der Veen F, Mol BW. Cost-effectiveness of treatment strategies in women with PCOS who do not conceive after six cycles of clomiphene citrate. Reprod Biomed Online. 2014;28(5):606-13.

9. Luo L, Chen M, Wen Y, Zhang L, Zhou C, Wang Q. Pregnancy outcome and cost-effectiveness comparisons of artificial cycle-prepared frozen embryo transfer with or without GnRH agonist pretreatment for polycystic ovary syndrome: a randomised controlled trial. Bjog. 2021;128(4):667-74.

10. Alenzi EO. Cost-effectiveness analysis of polycystic ovary syndrome management and the risk of gestational diabetes in pregnant women: a decision-tree model. Expert Rev Pharmacoecon Outcomes Res. 2021;21(5):995-9.
